# Supplementary material for: Structure of the human ATM kinase and mechanism of Nbs1 binding
Source: eLife journal article supplement (doi:10.7554/elife.74218), 2022-01-25

Figure 4E

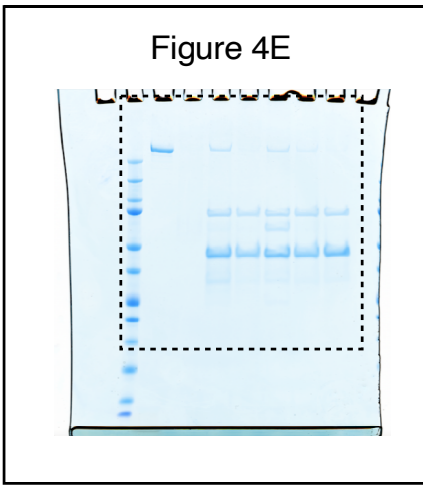

Figure 5A

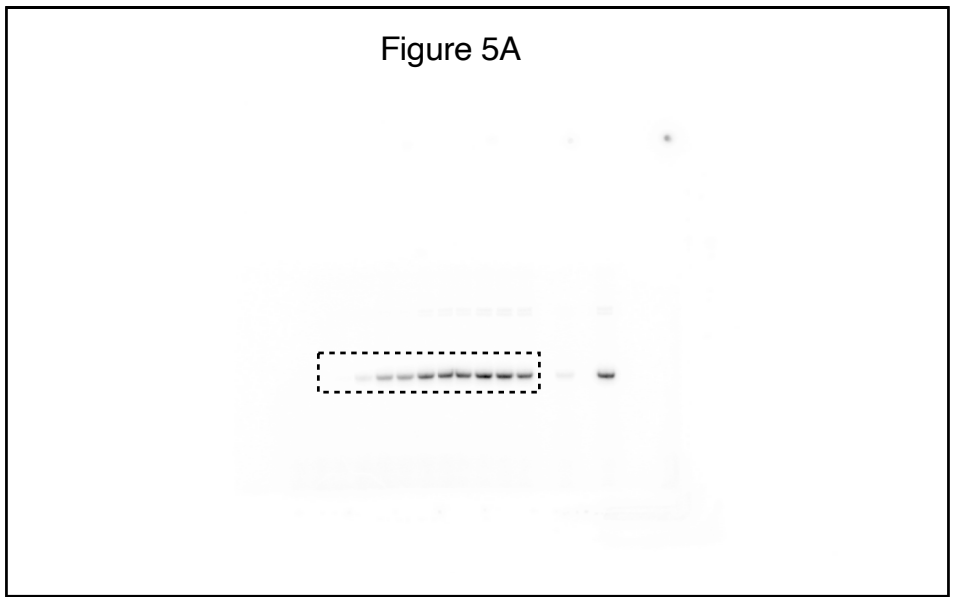

Figure 5B

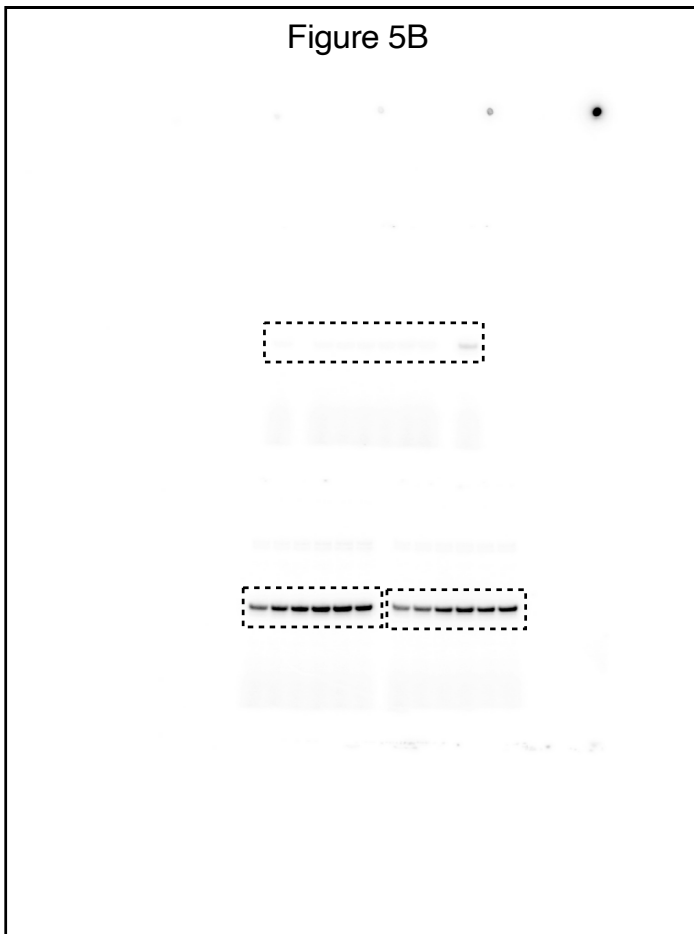

Figure 5C

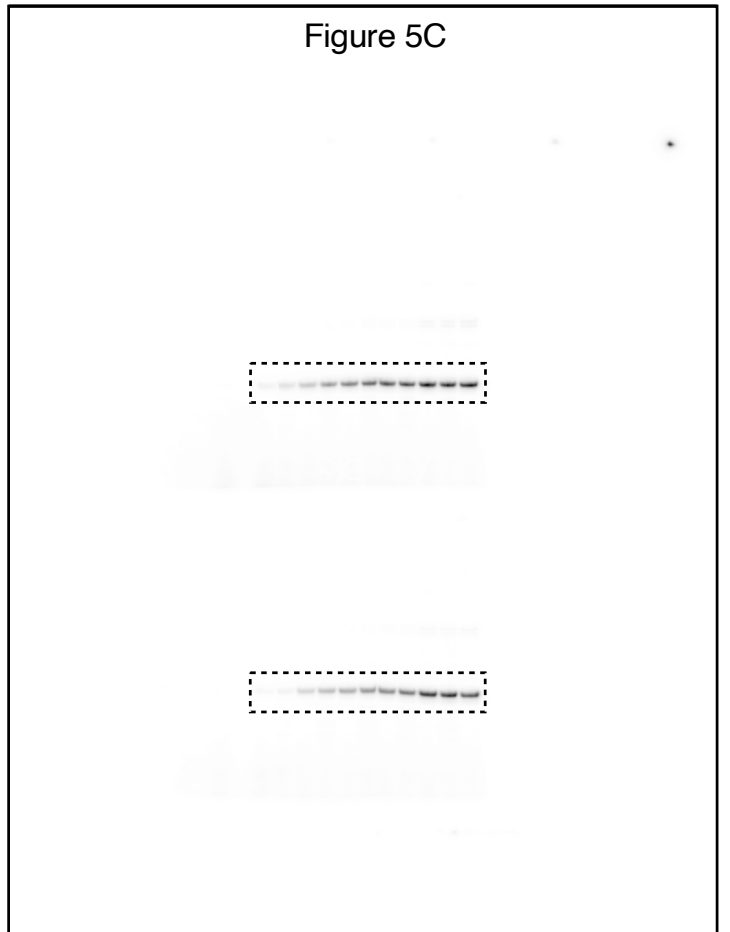

Figure 1 - Figure Supplement 1A

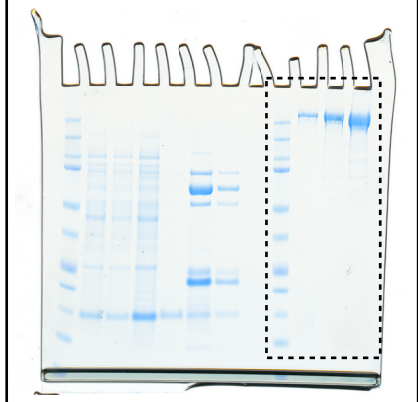

Figure 1 - Figure Supplement 1B

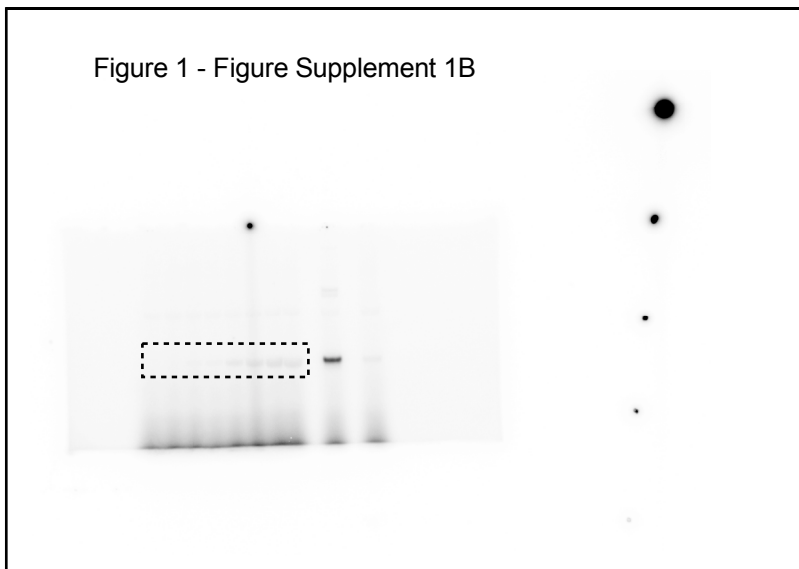

Figure 4 - Figure Supplement 2C

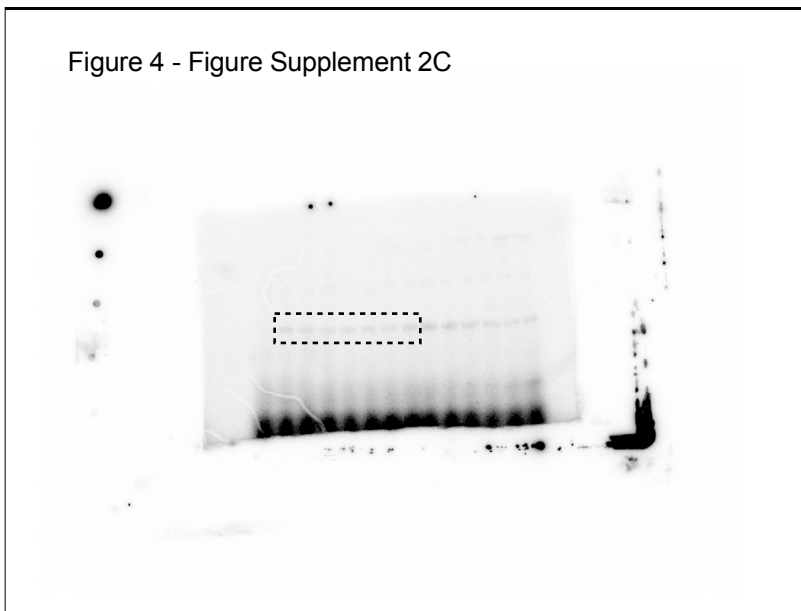

Figure 5 - Figure Supplement 1A

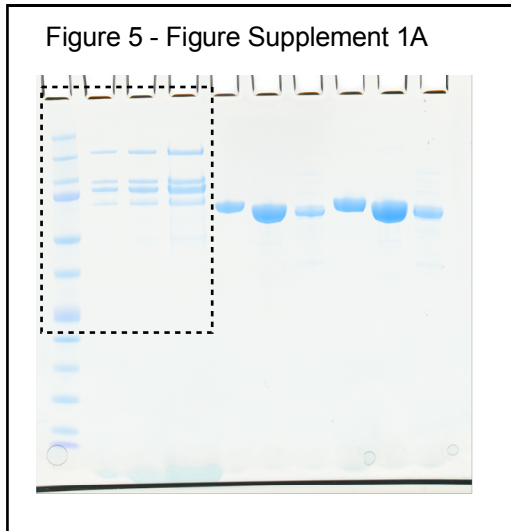

Figure 5 - Figure Supplement 1E

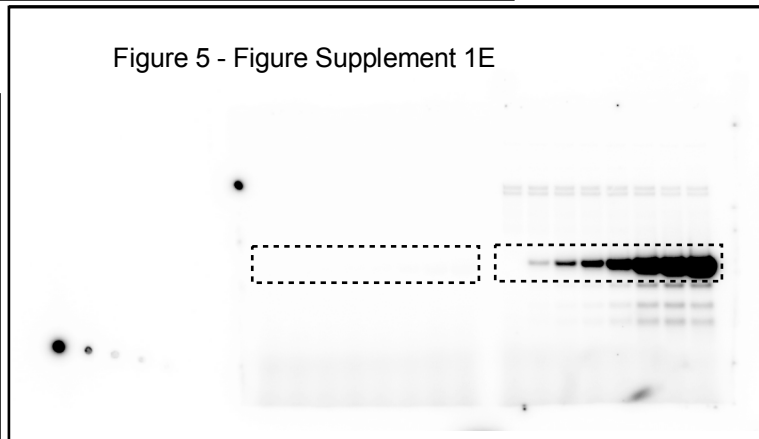

Figure 5 - Figure Supplement 1B

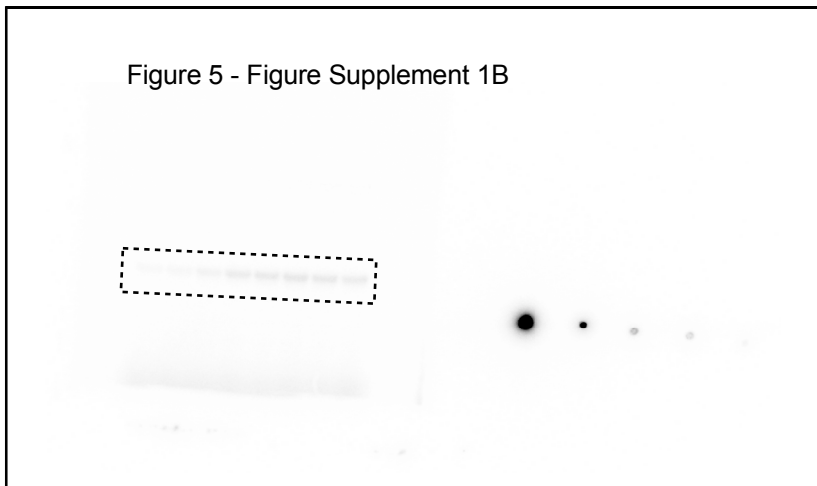

Figure 5 - Figure Supplement 1G

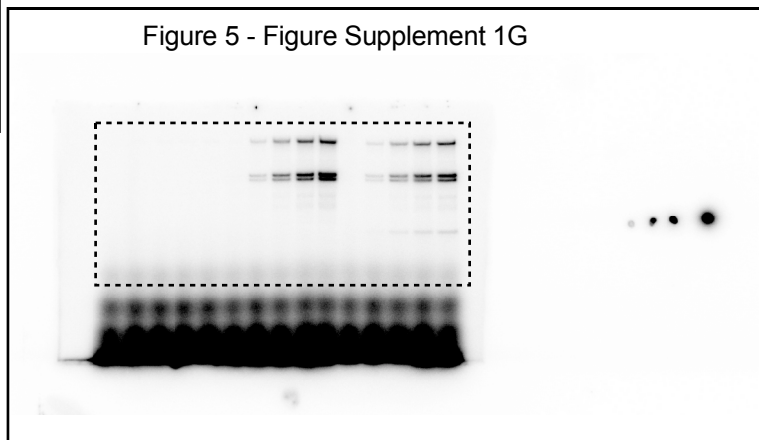

Figure 5 -  
Figure Supplement 1C

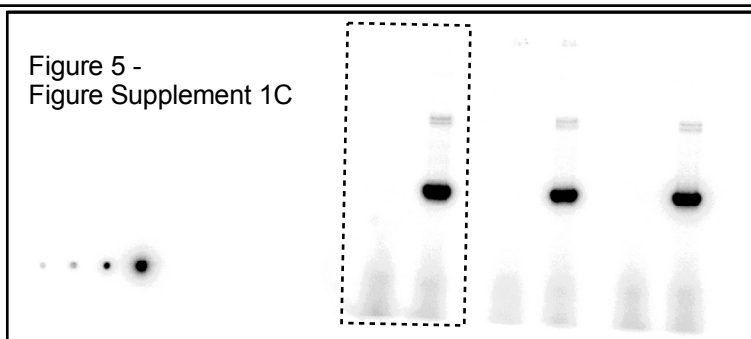

Supplement: data1 [file elife-74218-data1-v2.pdf]
