# Supplementary material for: Structure of the human ATM kinase and mechanism of Nbs1 binding
Source: eLife. 2022 Jan 25;11:e74218. doi: 10.7554/eLife.74218 (PMC8828054; doi:10.7554/eLife.74218)
Supplement: Supplementary file 1. [file elife-74218-supp1.xlsx]

## Sheet: Sheet1
	ATM Kinase + MgCl2 + AMP-PNP			ATM Kinase + MgCl2 + AMP-PNP + Nc28
	(EMDB-25140, PDB-7SIC)			(EMDB-25141, PDB-7SID)
Data Collection
Magnification	22500			81000
Voltage (kV)	300			300
Electron Dose (e-/ Å2)	53.8			51.6
Defocus Range (µm)	-0.6 to -1.6			-1.0 to -2.5
Pixel Size (Å)	1.056			1.078
Data Processing	Overall	Open	Closed
Initial Number of Particles	2546747	2546747	2546747	2224245
Final Number of Particles	303604	44152	44114	224367
Map Resolution (Å)
Dimer (C2)	2.51	2.75	2.78	2.53
Symmetry Expanded Protomer (C1)	2.46	2.8	2.85	2.59
FATKD-focused symmetry Expanded Protomer (C1)	2.4	2.71	2.78	2.53
HEAT-focused symmetry Expanded Protomer (C1)	2.8	3.17	3.14	3.02
FSC Threshold	0.143	0.143	0.143	0.143
Structure Refinement (Protomer)
Initial Model Used	5np0 (chain A)	5np0 (chain A)	5np0 (chain A)	5np0 (chain A)
Refinement Resolution (Å)	2.6	2.8	2.8	2.6
Map Sharpening B Factor (Å2)	-(54-66)	-(39-52)	-(40-46)	-(54-65)
Model Composition
Nonhydrogen Atoms	22242	22228	22165	22325
Protein Residues	2773	2773	2766	2783
Ligands	2	2	2	2
Mean B Factors (Å2)
Protein	54.27	64.57	63.55	77.51
Ligand	50.9	55.32	57.95	68.29
R.M.S. Deviations
Bond Lengths (Å)	0.003	0.003	0.002	0.002
Bond Angles (˚)	0.545	0.578	0.558	0.474
Validation
MolProbity Score	1.3	1.39	1.54	1.21
Clashscore	5.49	7.08	7.64	4.26
Rotomer Outliers (%)	0.08	0.04	0.04	0
Model to Map CC (mask)	0.81	0.81	0.81	0.82
Ramachandran Statistics
Favored (%)	98.32	98.1	97.36	98.43
Allowed (%)	1.68	1.9	2.64	1.57
Outliers (%)	0	0	0	0
Rama-Z Score	1.75	2.11	1.71	2.35
